# Supplementary material for: A Case of Recurrent Erysipelas Caused by Streptococcus mitis Group
Source: Hindawi journal article supplement (doi:10.1155/2018/5156085), 2018-05-30
Supplement: f1 [file 5156085.f1.pdf]

## Case Report

### A Case of Recurrent Erysipelas Caused by *Streptococcus mitis* Group

David Nygren, Bo Nilson, and Magnus Rasmussen

**Supplement Table S1** MALDI-TOF MS identification and antibiotic susceptibility profile of isolated *S. mitis* and *S. oralis* isolates

|                        | MALDI Biotyper <sup>a</sup> |                |                           |    |     |    |                  | Specific peaks for <i>S. pneumoniae</i> , <i>S. mitis</i> , and <i>S. oralis</i> <sup>c</sup> |                     |                     |                     |                     | Antibiotic susceptibility profile |            |            |                  |                  |
|------------------------|-----------------------------|----------------|---------------------------|----|-----|----|------------------|-----------------------------------------------------------------------------------------------|---------------------|---------------------|---------------------|---------------------|-----------------------------------|------------|------------|------------------|------------------|
|                        | log (score)                 |                | list (score) <sup>b</sup> |    |     |    |                  | m/z value                                                                                     |                     |                     |                     |                     | penicillin                        | vancomycin | gentamicin | clindamycin      | optochin         |
| Strain<br>(Isolate no) | Best<br>match               | score<br>value | p                         | m  | o   | sp | Best<br>match    | 4964.3 <sup>d</sup>                                                                           | 5297.6 <sup>e</sup> | 5822.5 <sup>e</sup> | 6839.1 <sup>f</sup> | 6888.9 <sup>d</sup> | MIC (mg/L)                        | MIC (mg/L) | MIC (mg/L) | SIR <sup>g</sup> | SIR <sup>g</sup> |
| 15-1 (1)               | <i>S. mitis</i>             | 2.28           | 2                         | 92 | 26  | 0  | <i>S. mitis</i>  | -                                                                                             | -                   | -                   | +                   | -                   | 0.064                             | 0.25       | 2          | S                | R                |
| 17-1 (2)               | <i>S. mitis</i>             | 2.51           | 0                         | 90 | 43  | 0  | <i>S. mitis</i>  | -                                                                                             | -                   | -                   | +                   | -                   | 0.125                             | 0.5        | 2          | S                | R                |
| 17-2 (3)               | <i>S. oralis</i>            | 2.48           | 0                         | 11 | 113 | 0  | <i>S. oralis</i> | -                                                                                             | -                   | +                   | +                   | -                   | 0.125                             | 1          | 16         | S                | R                |

<sup>a</sup> Bruker MALDI Biotyper database version 7311

<sup>b</sup> The list (score) is defined as the sum of weighted log (scores) for each single species according to Harju *et al* (20). p, *S. pneumoniae*; m, *S. mitis*; o, *S. oralis*; sp., any other species in the MALDI Biotyper database.

<sup>c</sup> Specific peaks according to Marin *et al* (21)

<sup>d</sup> Peak associated with *S. pneumoniae*

<sup>e</sup> Peak associated with *S. oralis*

<sup>f</sup> Peak associated with *S. mitis* and *S. oralis*

<sup>g</sup> S, susceptible; R, resistant
